# Supplementary figures and images for: Control of IBMIR in Neonatal Porcine Islet Xenotransplantation in Baboons
Source: PubMed Central journal article supplement — Am J Transplant. 2014 Jan 23;14(6):1300–9. doi: 10.1111/ajt.12722 (PMC4204157; doi:10.1111/ajt.12722), 2014-01-23

# Supplementary figure 1

A

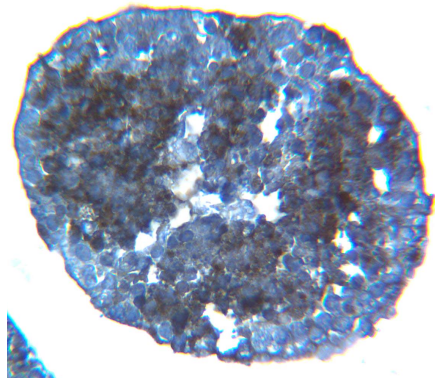

B

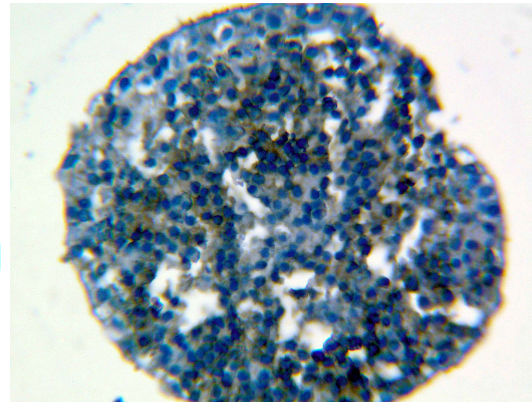

Supplement: ajt0014-1300-sd1.pdf [file ajt0014-1300-sd1.pdf]

## Supplementary figure 2

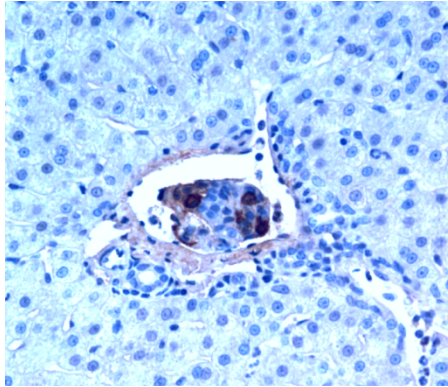

Supplement: ajt0014-1300-sd2.pdf [file ajt0014-1300-sd2.pdf]

# Supplementary figure 3

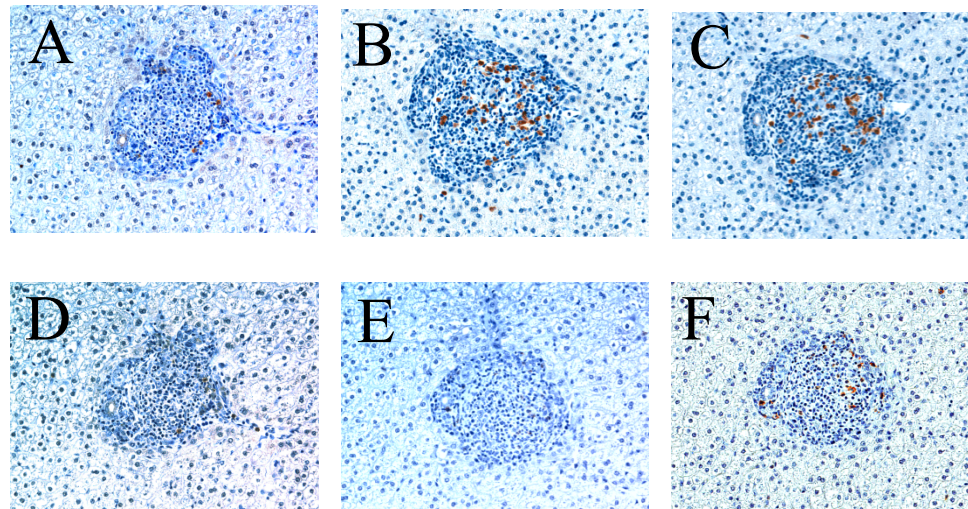

Supplement: ajt0014-1300-sd3.pdf [file ajt0014-1300-sd3.pdf]
